# Supplementary material for: Orthodontic Status and Association with Oral-Health-Related Quality of Life—A Study of 16-Year-Old Norwegians with a Cleft Lip and Palate
Source: MDPI journal article supplement (doi:10.3390/ijerph21050550), 2024-04-26
Supplement: s1 [file s1]

# Orthodontic Status and Association with Oral-Health-Related Quality of Life—A Study of 16-Year-Old Norwegians with a Cleft Lip and Palate

## Supplementary file

**Table S1.** Bergen Orthodontic Grading Index

---

### **Intermaxillary Sagittal relation (ANB-angle/facial profile)**

- 1 Poor (ANB=  $<-5^{\circ}$ )
- 2 Rather poor (ANB=  $\geq -5^{\circ}$  and  $<-2^{\circ}$ )
- 3 Fair (ANB=  $\geq -2^{\circ}$  and  $<0^{\circ}$ )
- 4 Good (ANB =  $\geq 0^{\circ}$  and  $\leq 2^{\circ}$ )
- 5 Perfect (ANB =  $>2^{\circ}$ )

---

### **Dental arch and future need for orthodontic and prosthodontic treatment**

- 1 Major spacing/missing teeth
- 2 Minor spacing/missing teeth
- 3 Misaligned teeth
- 4 Acceptable aligned dentitions
- 5 Perfect aligned dentitions

---

### **Occlusion and the need for orthognathic surgery**

- 1 Negative overjet more than 8 mm
- 2 Negative overjet -1 to -8 mm
- 3 Edge to edge occlusion
- 4 Positive overjet
- 5 Perfect occlusion and overjet

**Table S2. Frequency distribution n (%) of clinical indicators, according to cleft type.**

| <b>Clinical indicators</b>                                       | <b>UCLP<br/>n (%)</b> | <b>BCLP<br/>n (%)</b> | <b>CL<br/>n (%)</b> | <b>CP<br/>n (%)</b> | <b>Total<br/>n (%)</b> |
|------------------------------------------------------------------|-----------------------|-----------------------|---------------------|---------------------|------------------------|
| <b>Missing teeth (agenesis or extracted due to poor quality)</b> |                       |                       |                     |                     |                        |
| Yes                                                              | 27 (84.4) *           | 11 (100) *            | 11 (32.4)           | 17 (37.8)           | 66 (54.1)              |
| No                                                               | 5 (15.6)              | 0 (0)                 | 23 (67.6)           | 28 (62.2)           | 56 (45.9)              |
| <b>Intermaxillary sagittal relations (facial profile)</b>        |                       |                       |                     |                     |                        |
| ANB= <0° (poor – fair sagittal relationship)                     | 21 (65.6) *           | 7 (63.6) *            | 11 (32.4)           | 3 (6.7)             | 42 (34.4)              |
| ANB= ≥0° (good – perfect sagittal relationship)                  | 11 (34.4)             | 4 (36.4)              | 23 (67.6)           | 42 (93.3)           | 80 (65.6)              |
| <b>Dental arch</b>                                               |                       |                       |                     |                     |                        |
| Spacing and malaligned dentition                                 | 18 (56.3) *           | 9 (81.8) *            | 6 (17.6)            | 6 (13.3)            | 39 (32.0)              |
| Acceptable-perfect dentition                                     | 14 (43.8)             | 2 (18.2)              | 28 (82.4)           | 39 (86.7)           | 83 (68.0)              |
| <b>Occlusion</b>                                                 |                       |                       |                     |                     |                        |
| Negative overjet or open bite                                    | 9 (28.1) *            | 4 (36.4) *            | 1 (2.9)             | 3 (6.7)             | 17 (13.9)              |
| Positive overjet and good occlusion                              | 23 (71.9)             | 7 (63.6)              | 33 (97.1)           | 42 (93.3)           | 105 (86.1)             |

\*p&lt;0.05

**Table S3.** The unadjusted association between satisfaction with dental aesthetic and OHRQoL.

|                        | Self-reported dental aesthetic |               |
|------------------------|--------------------------------|---------------|
|                        | Satisfied                      | Not satisfied |
| <b>OHIP-14 scoring</b> |                                |               |
| No impact (OHIP-14=0)  | 23 (23.5)                      | 1 (4.2)       |
| Impact (OHIP-14>0)     | 75 (76.5)                      | 23 (95.8)*    |
| Total                  | 98 (80.3)                      | 24 (19.7)     |

\*p&lt;0.05
